# Supplementary material for: Brain-Derived Extracellular Vesicles as Nanobiotechnology Biomarkers of Small Vessel Disease (CADASIL)
Source: Research Square preprint supplement (doi:10.21203/rs.3.rs-7511858/v1), 2025-09-17
Supplement: Supplementary file 1 [file 061bf4f2928f430ec16784aa.docx]

**SUPPLEMENTAL MATERIAL**

- 1. **Plasma exosome samples processed for Protein quantification by DIA-SWATH method**
  2. Plasma protein exosome extraction: One the exosomes were isolated the samples were mixed with a lysis buffer in ratio 1:1 (4% SDS, 100mM tris pH7.6 and 0.1mM DTT) and incubated at 95°C for 5 min [1].

**Plasma processing**

Aliquotes of each samples (30 μL) was depleted with dithiothreitol (DTT). Fresh DTT (500 mM) was mixed with 30 μL of human plasma samples and vortex briefly. Then the samples were incubated until to observe a viscous white precipitate that persist for 60 min, then centrifuge at 18,84 g for 20 min. Supernatants were transferred to a clean tube for protein alkylation process. For reduction SH-groups the proteins were treated with iodoacetic acid (IAA) for 45 min at room temperature avoided light. After this in both cases, proteins were loaded on a 10% SDS-PAGE gel. The run was stopped as soon as the front had penetrated 3 mm into the resolving gel. The protein band was detected by Sypro-Ruby fluorescent staining (Lonza, Switzerland), excised, and processed for in-gel, manual tryptic digestion as described elsewhere [2-4]. Peptides were extracted by carrying out three 20-min incubations in 40 μL of 60% acetonitrile dissolved in 0.5% HCOOH. The resulting peptide extracts were pooled, concentrated in a SpeedVac, and stored at −20 °C.

**Quantitative proteomic analysis**

Proteomic profiling was performed using a sequential window acquisition of all theoretical fragment ion spectra mass spectrometry (SWATH-MS), following protocols previously described by our group [5].

**Spectral Library Generation**

To build the MS/MS spectral library, a data-dependent acquisition (DDA) approach was applied. Representative peptide pools from the study groups were analyzed by micro-liquid chromatography coupled to tandem mass spectrometry (LC-MS/MS)[6],[7, 8] using a 40-minute gradient to ensure comprehensive representation of peptides and proteins within the samples. For each pool, 4 μL (~4 μg) were injected into a hybrid quadrupole time-of-flight mass spectrometer (TripleTOF® 6600, Sciex, Redwood City, CA, USA). The resulting data were analyzed using ProteinPilot software v5.0.1 (SCIEX, Framingham, MA, USA), in combination with the human-specific UniProt database (<https://www.uniprot.org/>) to generate the spectral library. Only peptides and proteins identified with a FDR below 1% were included in the final SWATH-MS library.

**Relative Quantification via SWATH-MS Acquisition**

Quantitative analysis was conducted on the same TripleTOF® 6600 LC-MS/MS system using a data-independent acquisition (DIA) approach. All individual samples, along with two technical triplicates per sample, were analyzed separately (4 μL per injection). SWATH-MS acquisition consisted of 100 high-sensitivity TOF MS/MS scans (400–1500 m/z, 50 ms acquisition time) with overlapping precursor isolation windows of variable widths (1 m/z overlap), covering the 400–1250 m/z range. Each cycle included a prior TOF MS scan (400–1500 m/z, 50 ms), resulting in a total cycle time of 6.3 s.

Data were processed using PeakView software (version 2.2; SCIEX) and the SWATH Acquisition MicroApp (version 2.0; SCIEX). Protein quantification was based on signal intensity from 10 peptides per protein and 7 fragment ions per peptide, ensuring high accuracy. After statistical analysis, normalization was applied using the Most Likely Ratio (MLR) method to correct for potential sample preparation variability across different samples.

**Table S1**. **Significant proteins** **in plasma of patients with CADASIL.** Downregulated proteins included key mediators of energy metabolism (e.g., MT-CO2, IDH1, IDH3A, SLC2A3, PYGM), protein synthesis and gene expression (RPL4, RPL11, RPL23A, IGF2BP1), and protein folding (FKBP1A, ST13). Structural proteins essential for cytoskeletal integrity (TUBB, CFL1, PFN1, NEFL, MSN) and components of vesicular trafficking (NUTF2, ABCG2, AP2S1, RAB5B, RAB14, SYNJ1) were also downregulated. Immune-related and stress response proteins (S100A8, CD47, CFI, CSTA, MAPT, CNTN1, SYNCRIP, GSTP1) showed reduced expression, suggesting impairment in neuroimmune homeostasis and oxidative stress management. Upregulated proteins included fibrinogen chains (FGA, FGB, FGG), indicative of prothrombotic activity, and acute-phase/inflammatory markers (CRP, CFI, C4B, IGHG4), along with components involved in tissue remodeling (HABP2) and intracellular signaling and metabolism (YWHAB, GNAO1, AK1, CAPS.

| Gene UniProt reference | | FC | * | *p*-value |
| --- | --- | --- | --- | --- |
| ABCG2 | Q9UNQ0 | 0,18728552 | ↓ | 0,00075798 |
| FKBP1A | P62942 | 0,27530402 | ↓ | 0,03951087 |
| CSTA | P01040 | 0,30044617 | ↓ | 0,00159455 |
| IGF2BP1 | Q9NZI8 | 0,32928903 | ↓ | 0,01277238 |
| PYGM | P11217 | 0,34254318 | ↓ | 0,02490242 |
| ST13 | P50502 | 0,36871751 | ↓ | 0,00139374 |
| RAB14 | P61106 | 0,4043024 | ↓ | 0,01796206 |
| MSN | P26038 | 0,41509879 | ↓ | 0,01550252 |
| ATP1A1 | P05023 | 0,41830285 | ↓ | 0,00014353 |
| SYNJ1 | O43426 | 0,42722782 | ↓ | 0,02377375 |
| RPL23A | P62750 | 0,43945594 | ↓ | 0,00011955 |
| MAPT (isoform 5) | P10636-5 | 0,47125793 | ↓ | 0,01942605 |
| RPL11 | P62913 | 0,4943212 | ↓ | 0,03181043 |
| CNTN1 | Q12860 | 0,50147297 | ↓ | 0,03949994 |
| RPL4 | P36578 | 0,50737798 | ↓ | 0,01130743 |
| RAB5B | P61020 | 0,50966049 | ↓ | 0,00757267 |
| MT-CO2 | P00403 | 0,5288047 | ↓ | 0,03790411 |
| NEFL | P07196 | 0,55369821 | ↓ | 0,00351147 |
| NUTF2 | P61970 | 0,55553683 | ↓ | 0,04320783 |
| S100A8 | P05109 | 0,56607399 | ↓ | 0,0328902 |
| CD47 | Q08722 | 0,58012359 | ↓ | 0,04848782 |
| AP2S1 | P53680 | 0,59239009 | ↓ | 0,02865883 |
| PFN1 | P07737 | 0,60791649 | ↓ | 0,02210158 |
| GSTP1 | P09211 | 0,61370814 | ↓ | 0,03602554 |
| SYNCRIP | O60506 | 0,62950214 | ↓ | 0,00824975 |
| SLC2A3 | P11169 | 0,6354553 | ↓ | 0,02891526 |
| TUBB | P07437 | 0,63952657 | ↓ | 0,00622956 |
| CFL1 | P23528 | 0,6447066 | ↓ | 0,02537534 |
| IDH1 | O75874 | 0,65779241 | ↓ | 0,03361681 |
| IDH3A | P50213 | 0,70877336 | ↓ | 0,01354529 |
| CFI | P05156 | 0,8357324 | ↓ | 0,02724929 |
| HABP2 | Q14520 | 1,19069396 | ↑ | 0,0153735 |
| FGA | P02671 | 1,306245 | ↑ | 0,01650373 |
| A1BG | P04217 | 1,39465666 | ↑ | 0,0199025 |
| GNA01 | P09471 | 1,40071277 | ↑ | 0,04489782 |
| FGG (isoform 2) | P02679-2 | 1,4027883 | ↑ | 0,00422705 |
| FGB | P02675 | 1,56295681 | ↑ | 0,02692789 |
| IGKV1D-37 | P0DSN7 | 1,60143247 | ↑ | 0,00349391 |
| C4B | P0C0L5 | 1,79135062 | ↑ | 0,02291969 |
| AK1 | P00568 | 2,9173503 | ↑ | 0,00285648 |
| IGHG4 | P01861 | 2,95972178 | ↑ | 0,03517001 |
| CAPS | Q13938 | 3,3136652 | ↑ | 0,0163798 |
| YWHAB | P31946 | 3,73449516 | ↑ | 0,03905183 |
| CRP | P02741 | 5,43280633 | ↑ | 0,03078086 |

* FC<1 downregulated ↓; FC>1 upregulated ↑

**Table S2. Significant proteins in total EVs of patients with CADASIL.** A total of 29 proteins were significantly downregulated, including key regulators of oxidative stress and cytoskeletal stability (PRDX5, ALDH1L1, CFL1), energy metabolism and cellular homeostasis (PGLYRP2, HNRNPA0, SLC2A1, PHB1), intracellular signaling (TRIM28, PHB1) and calcium control (YWHAE, PCP4), immune modulation and endothelial integrity (THBS1, C8A, PAICS, ITIH1) and cytoskeletal organization (IGF2BP3, SEPTIN7, SH3BGRL3, PAPL), and immune modulation and endothelial integrity (THBS1, C8A, PAICS). Proteins involved in protein folding and assembly (DYNC1I1, CCT6A) also showed reduced expression. Nine proteins were significantly upregulated, including CLU and RPL29, associated with cellular stress responses; IGHV5-10-1, linked to immune activation; and AFM, FTL, related to iron metabolism and oxidative stress. Additional upregulated proteins (SPP2, QDPR, STXBP1, and PCYT2) are involved in extracellular matrix remodeling, neurotransmitter synthesis, synaptic function, and phospholipid biosynthesis, respectively

| Gene UniProt reference | | FC | * | *p*-value |
| --- | --- | --- | --- | --- |
| THBS1 | P07996 | 0,10382039 | ↓ | 0,04435953 |
| PCP4 | P48539 | 0,12899889 | ↓ | 0,01977149 |
| PAPL | Q6TUY0 | 0,14549007 | ↓ | 0,02112549 |
| PGLYRP2 | Q96PD5 | 0,2151038 | ↓ | 0,02764053 |
| PRDX5 | P30044 | 0,21992023 | ↓ | 0,03836891 |
| ALDH1L1 | O75891 | 0,22705379 | ↓ | 0,01692015 |
| IGF2BP3 | O00425 | 0,24180807 | ↓ | 0,03478366 |
| SEPTIN7 | Q16181 | 0,25022556 | ↓ | 0,00199882 |
| PAICS | P22234 | 0,30856866 | ↓ | 0,01833586 |
| CFL1 | P23528 | 0,33667874 | ↓ | 0,04668687 |
| SLC2A1 | P11166 | 0,34859323 | ↓ | 0,02597182 |
| C8A | P07357 | 0,36010702 | ↓ | 0,03806472 |
| DYNC1I1 | O14576 | 0,36106626 | ↓ | 0,01660854 |
| CCT6A | P40227 | 0,38415912 | ↓ | 0,03632341 |
| ENPP6 | Q6UWR7 | 0,4026263 | ↓ | 0,00984236 |
| TRIM28 | Q13263 | 0,41793488 | ↓ | 0,01081677 |
| HNRNPA0 | Q13151 | 0,42220542 | ↓ | 0,0346529 |
| ITIH1 | P19827 | 0,4415894 | ↓ | 0,0122264 |
| PHB1 | P35232 | 0,44844269 | ↓ | 0,04801991 |
| SH3BGRL3 | Q9H299 | 0,46249815 | ↓ | 0,0344086 |
| YWHAE | P62258 | 0,47368015 | ↓ | 0,04233927 |
| PTPN23 | Q9H3S7 | 0,48603261 | ↓ | 0,0422541 |
| LYZ | P61626 | 0,54419632 | ↓ | 0,0179025 |
| MAPT | P10636-5 | 0,5851735 | ↓ | 0,02938633 |
| HEBP1 | Q9NRV9 | 0,62174243 | ↓ | 0,03692493 |
| HSPA8 | P11142 | 0,6700216 | ↓ | 0,0469038 |
| IGKV1D-37 | P0DSN7 | 0,69244627 | ↓ | 0,04159671 |
| IDH1 | O75874 | 0,74125131 | ↓ | 0,04245316 |
| CLU | P10909 | 1,39841955 | ↑ | 0,02013213 |
| AFM | P43652 | 1,47880303 | ↑ | 0,02069914 |
| SPP2 | Q13103 | 1,83624274 | ↑ | 0,04222158 |
| IGHV5-10-1 | A0A0J9YXX1 | 1,85715699 | ↑ | 0,03249342 |
| QDPR | P09417 | 2,20086485 | ↑ | 0,04777321 |
| RPL29 | P47914 | 2,29285999 | ↑ | 0,02814657 |
| PCYT2 | Q99447 | 2,52245071 | ↑ | 0,02315125 |
| FTL | P02792 | 2,82034694 | ↑ | 0,03375871 |
| STXBP1 | P61764 | 3,07148383 | ↑ | 0,0345275 |

* FC<1 downregulated ↓; FC>1 upregulated ↑

**Table S3.Significant proteins from neuronal EVs of CADASIL patients.** Downregulated proteins included key regulators of immune homeostasis (FCN2, C1QB), hormone signaling and axonal plasticity (PGRMC1, RTN4), ribosomal components (RPL23, RPL14, NPM1), as well as proteins involved in ubiquitination (UBE2N, USP5), gene regulation (HMGB2, PCBP1), membrane trafficking and calcium homeostasis (ANXA6), and vascular integrity (LUM). Additional immune-related proteins (HV266, HV372, KVD28) were also downregulated. Among the 11 upregulated proteins were involved in RNA processing (DDX5), metabolism (PDHA1) and calcium modulation (CAPN1), as well as regulation of cellular stability and function (CTSD, PHB2, FAU), extracellular matrix and tissue structure (FBLN1, MOG) and ribosomal proteins (RPL28 and RPL14). A global overview of the data showed 14 proteins with p < 0.05 concentrated at the extremes of the volcano plot.

| Gene UniProt reference | | FC | * | *p*-value |
| --- | --- | --- | --- | --- |
| FCN2 | Q15485 | 0,1612662 | ↓ | 0,04668211 |
| PGRMC1 | O00264 | 0,37274127 | ↓ | 0,00627993 |
| RPL23 | P62829 | 0,37802636 | ↓ | 0,0460863 |
| RTN4 | Q9NQC3 | 0,45949545 | ↓ | 0,02934878 |
| NPM1 | P06748 | 0,46212162 | ↓ | 0,04426974 |
| LUM | P51884 | 0,47433122 | ↓ | 0,01253342 |
| HV226 | A0A0B4J1V2 | 0,48034881 | ↓ | 0,00598077 |
| C1QB | P02746 | 0,52020111 | ↓ | 0,02946211 |
| KVD28 | P01615 | 0,52661665 | ↓ | 0,00750033 |
| RPL14 | P50914 | 0,54793646 | ↓ | 0,04890592 |
| UBE2N | P61088 | 0,56104404 | ↓ | 0,03924909 |
| HMGB2 | P26583 | 0,57049147 | ↓ | 0,03878785 |
| USP5 | P45974 | 0,65501533 | ↓ | 0,03097136 |
| ANXA6 | P08133 | 0,73645112 | ↓ | 0,02135558 |
| PCBP1 | Q15365 | 0,73667601 | ↓ | 0,03780612 |
| DDX5 | P17844 | 1,27767901 | ↑ | 0,01502632 |
| PDHA1 | P08559-4 | 1,59313055 | ↑ | 0,03214984 |
| CAPN1 | P07384 | 1,71530958 | ↑ | 0,04971114 |
| HV372 | A0A0B4J1Y9 | 1,81497806 | ↑ | 0,01051657 |
| FBLN1 | P23142 | 1,89524263 | ↑ | 0,00085539 |
| SPP2 | Q13103 | 2,07404838 | ↑ | 0,01926551 |
| CTSD | P07339 | 2,18449523 | ↑ | 0,02173368 |
| RPL28 | P46779 | 2,50435759 | ↑ | 0,03800349 |
| PHB2 | Q99623 | 2,69993737 | ↑ | 0,02209793 |
| FAU | P62861 | 3,02654243 | ↑ | 0,03628888 |
| MOG | Q16653-3 | 4,16556014 | ↑ | 0,04902658 |

* FC<1 downregulated ↓; FC>1 upregulated ↑

**Table S4.Significant proteins from astrocytic EVs of CADASIL patients.** Sixteen proteins were downregulated, including proteins implicated in metabolic and proteolytic pathways (QDPR, PDXP, PSMC2); proteins associated with neuronal structural integrity (TPM2, RPL7A, ALDH7A1, MAG) and proteins involved in cellular stress responses and signaling (PDIA6, SET, YWHAZ, SERPINA5). Additional downregulated proteins involved in gene transcription (H4C1), adaptive immunity (IGLV2-14, KV230) and protein synthesis and RNA processing (RPL6, DDX5) Conversely, 15 proteins were upregulated, associated with inflammation and tissue remodeling (ITIH2 and C8B), related to complement activation and endothelial integrity (CFH, VWF); and proteins, involved in cytoskeletal dynamics and protein folding (ACTB, CANX). Other upregulated proteins included processes like: RNA metabolism and gene regulation (HNRNPD, SYNCRIP, YBX1), vesicular trafficking (NAPG), energy homeostasis AK1 (AK1), synaptic plasticity (PCP4), immune regulation (HV338), and ribosomal components (RPL3, RPL18A).

| Gene UniProt reference | | FC | * | *p*-value |
| --- | --- | --- | --- | --- |
| QDPR | P09417 | 0,26480837 | ↓ | 0,01142221 |
| PDXP | Q96GD0 | 0,33643808 | ↓ | 0,01906314 |
| PSMC2 | P35998 | 0,43682311 | ↓ | 0,04179149 |
| TPM2 | P07951 | 0,47855254 | ↓ | 0,0444906 |
| RPL7A | P62424 | 0,49568245 | ↓ | 0,05587089 |
| ALDH7A1 | P49419 | 0,50024214 | ↓ | 0,0143492 |
| IGLV2-14 | P01704 | 0,51254871 | ↓ | 0,02464176 |
| PDIA6 | Q15084 | 0,53368124 | ↓ | 0,02334178 |
| KV230 | P06310 | 0,54337643 | ↓ | 0,01520146 |
| H4C1 | P62805 | 0,61731931 | ↓ | 0,04523085 |
| SET | Q01105 | 0,63765508 | ↓ | 0,04970737 |
| MAG | P20916 | 0,6401821 | ↓ | 0,05141993 |
| YWHAZ | P63104 | 0,65582154 | ↓ | 0,03358772 |
| SERPINA5 | P05154 | 0,66046137 | ↓ | 0,04654536 |
| RPL6 | Q02878 | 0,66282651 | ↓ | 0,00719577 |
| DDX5 | P17844 | 0,66506212 | ↓ | 0,01638455 |
| ITIH2 | P19823 | 1,34420166 | ↑ | 0,01115975 |
| C8B | P07358 | 1,36904122 | ↑ | 0,04851983 |
| HNRNPD | Q14103 | 1,37379437 | ↑ | 0,00512255 |
| SYNCRIP | O60506 | 1,56511116 | ↑ | 0,00851705 |
| NAPG | Q99747 | 1,6884433 | ↑ | 0,05018468 |
| CFH | P08603 | 1,68887698 | ↑ | 0,04808075 |
| VWF | P04275 | 1,83895389 | ↑ | 0,0448333 |
| RPL3 | P39023 | 1,95426559 | ↑ | 0,01038249 |
| HV338 | A0A0C4DH36 | 2,018091 | ↑ | 0,04148483 |
| RPL18A | Q02543 | 2,36374325 | ↑ | 0,03499781 |
| ACTB | P60709 | 2,46871399 | ↑ | 0,03582268 |
| CANX | P27824 | 2,73220593 | ↑ | 0,01806673 |
| PCP4 | P48539 | 2,8370701 | ↑ | 0,05097907 |
| AK1 | P00568 | 3,08829146 | ↑ | 0,02482934 |
| YBX1 | P67809 | 23,4360563 | ↑ | 0,01281874 |

* FC<1 downregulated ↓; FC>1 upregulated ↑

**Table S5.Significant proteins from oligodendrocytes EVs of CADASIL patients.** comprising 13 downregulated and 10 upregulated proteins. Downregulated proteins included AP2B1 and SNAP91, essential for vesicular trafficking and endocytosis; HNRNPAB and EEF1G, involved in RNA processing and translational regulation; and TKT, UCHL1, and VDAC1, which play key roles in energy metabolism, proteostasis, and mitochondrial ion transport. Additional downregulated proteins such as CYTB, SAA1, IGHV3-38, IGHV3-72, ITIH3, and NCDN are associated with lysosomal function, extracellular matrix stability, and intracellular signaling, indicating broad disruption of cellular homeostasis and intercellular communication. Conversely, upregulated proteins included metabolic enzymes (IMPDH2, ALDH2, PGLS), signaling mediators (CALM3, AHCY, SERPINB9), structural and regulatory components (H3-4, RPL27A, TMEM67), many of which are implicated in nucleotide biosynthesis, mitochondrial detoxification, calcium signaling, apoptosis regulation, and cilia-associated functions

| Gene UniProt reference | | FC | * | *p*-value |
| --- | --- | --- | --- | --- |
| AP2B1 | P63010 | 0,017401794 | ↓ | 0,012343429 |
| ITIH3 | Q06033 | 0,384082469 | ↓ | 0,038814600 |
| NCDN | Q9UBB6 | 0,392359839 | ↓ | 0,004950691 |
| CSTB | P04080 | 0,452695614 | ↓ | 0,026053021 |
| TKT | P29401 | 0,458971623 | ↓ | 0,005517768 |
| UCHL1 | P09936 | 0,491834763 | ↓ | 0,040464573 |
| SAA1 | P0DJI8 | 0,567752533 | ↓ | 0,010788659 |
| IGHV3-38 | A0A0C4DH36 | 0,575198188 | ↓ | 0,018092475 |
| EEF1G | P26641 | 0,620449747 | ↓ | 0,019652946 |
| SNAP91 | O60641 | 0,622200916 | ↓ | 0,036857262 |
| HNRNPAB | Q99729-3 | 0,652537947 | ↓ | 0,039754036 |
| IGHV3-72 | A0A0B4J1Y9 | 0,665368576 | ↓ | 0,030768410 |
| VDAC1 | P21796 | 0,759598764 | ↓ | 0,044485575 |
| IMPDH2 | P12268 | 1,464012882 | ↑ | 0,049190660 |
| ALDH2 | P05091 | 1,621564830 | ↑ | 0,001856867 |
| AMPH | P49418 | 1,626633970 | ↑ | 0,007845707 |
| AHCY | P23526 | 1,642683528 | ↑ | 0,027017368 |
| SERPINB9 | P50453 | 1,801374062 | ↑ | 0,036402067 |
| PGLS | O95336 | 2,026488735 | ↑ | 0,008029012 |
| H3-4 | Q16695 | 2,033033999 | ↑ | 0,000892957 |
| CALM3 | P0DP25 | 2,043473941 | ↑ | 0,019877138 |
| RPL27A | P46776 | 2,193153489 | ↑ | 0,015541500 |
| TMEM67 | Q5HYA8 | 2,722506179 | ↑ | 0,012358365 |

* FC<1 downregulated ↓; FC>1 upregulated ↑

**Figure S1.**

**
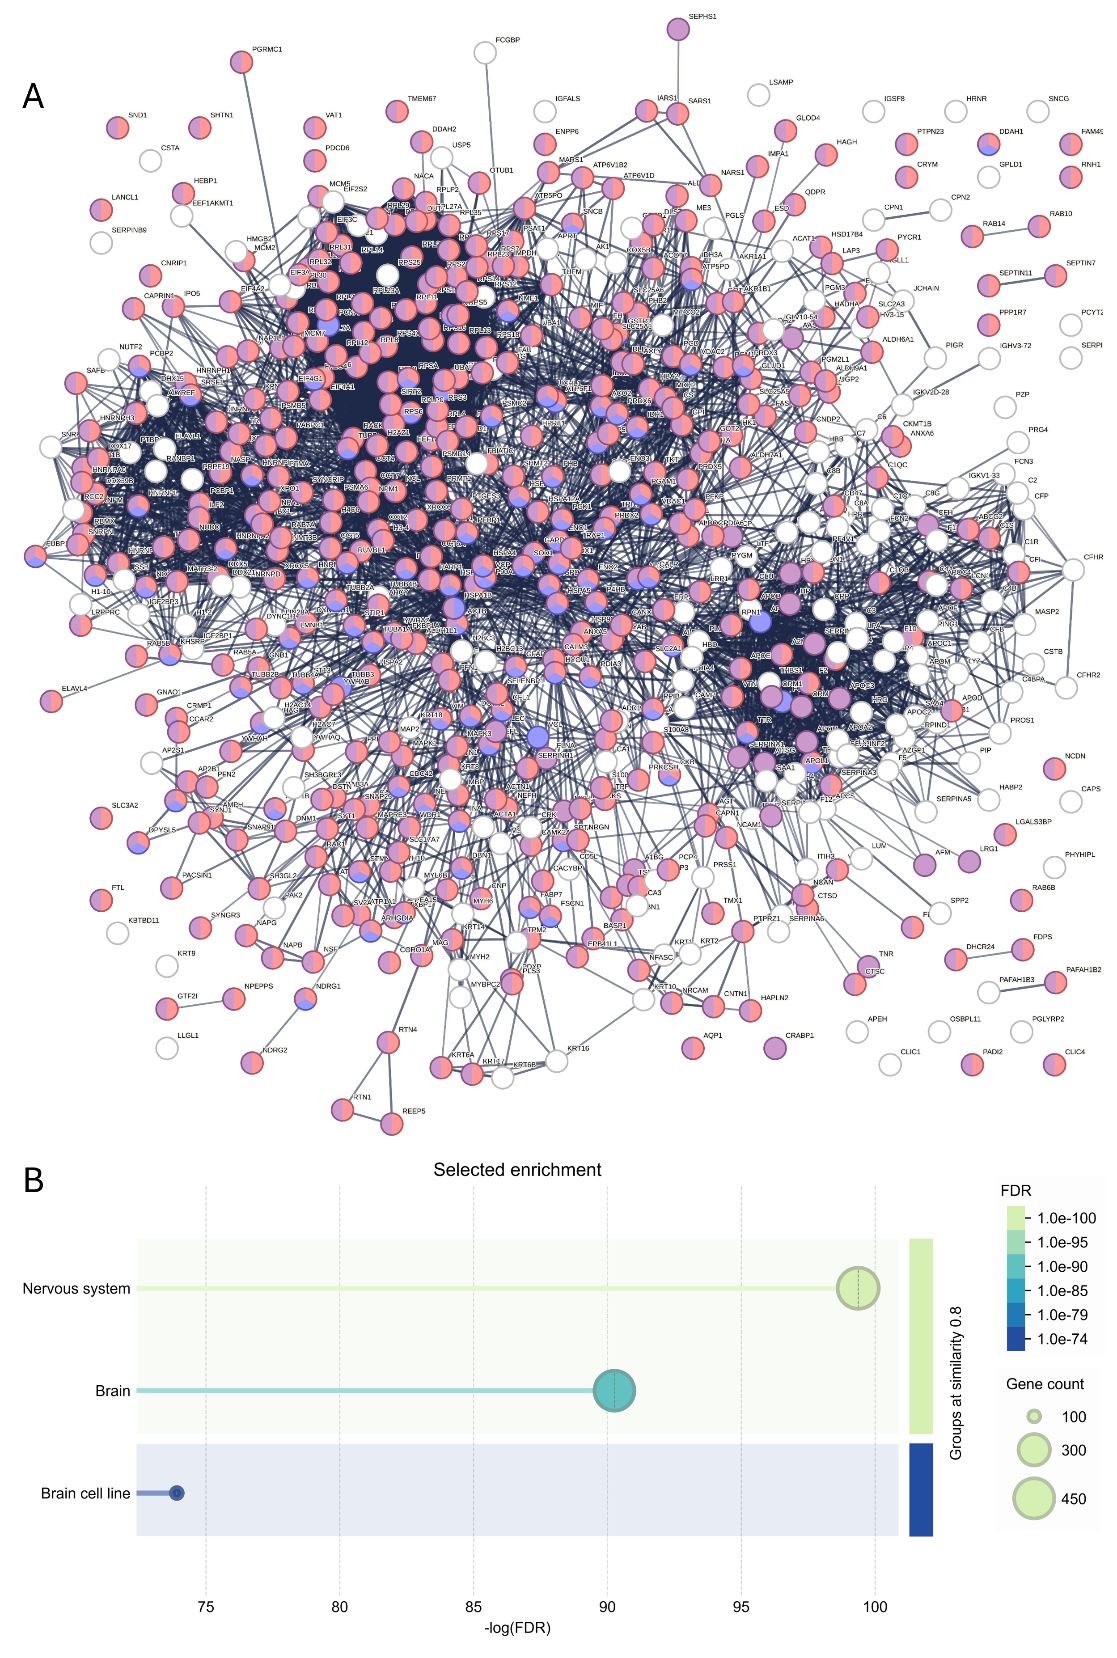
**

**Figure S1**. **Enrichment analysis of total quantified proteins**. **(A)** A protein–protein interaction (PPI=0,07) network was constructed using the STRING database, based on the total set of proteins quantified by SWATH-MS. **(B)** Subsequent Gene Ontology Cellular Component (GO:CC) enrichment analysis revealed that the identified proteins were significantly enriched in brain, nervous system and brain-derived cell line compartments, suggesting a strong association with neural-specific cellular contexts.

**Figure S2.**


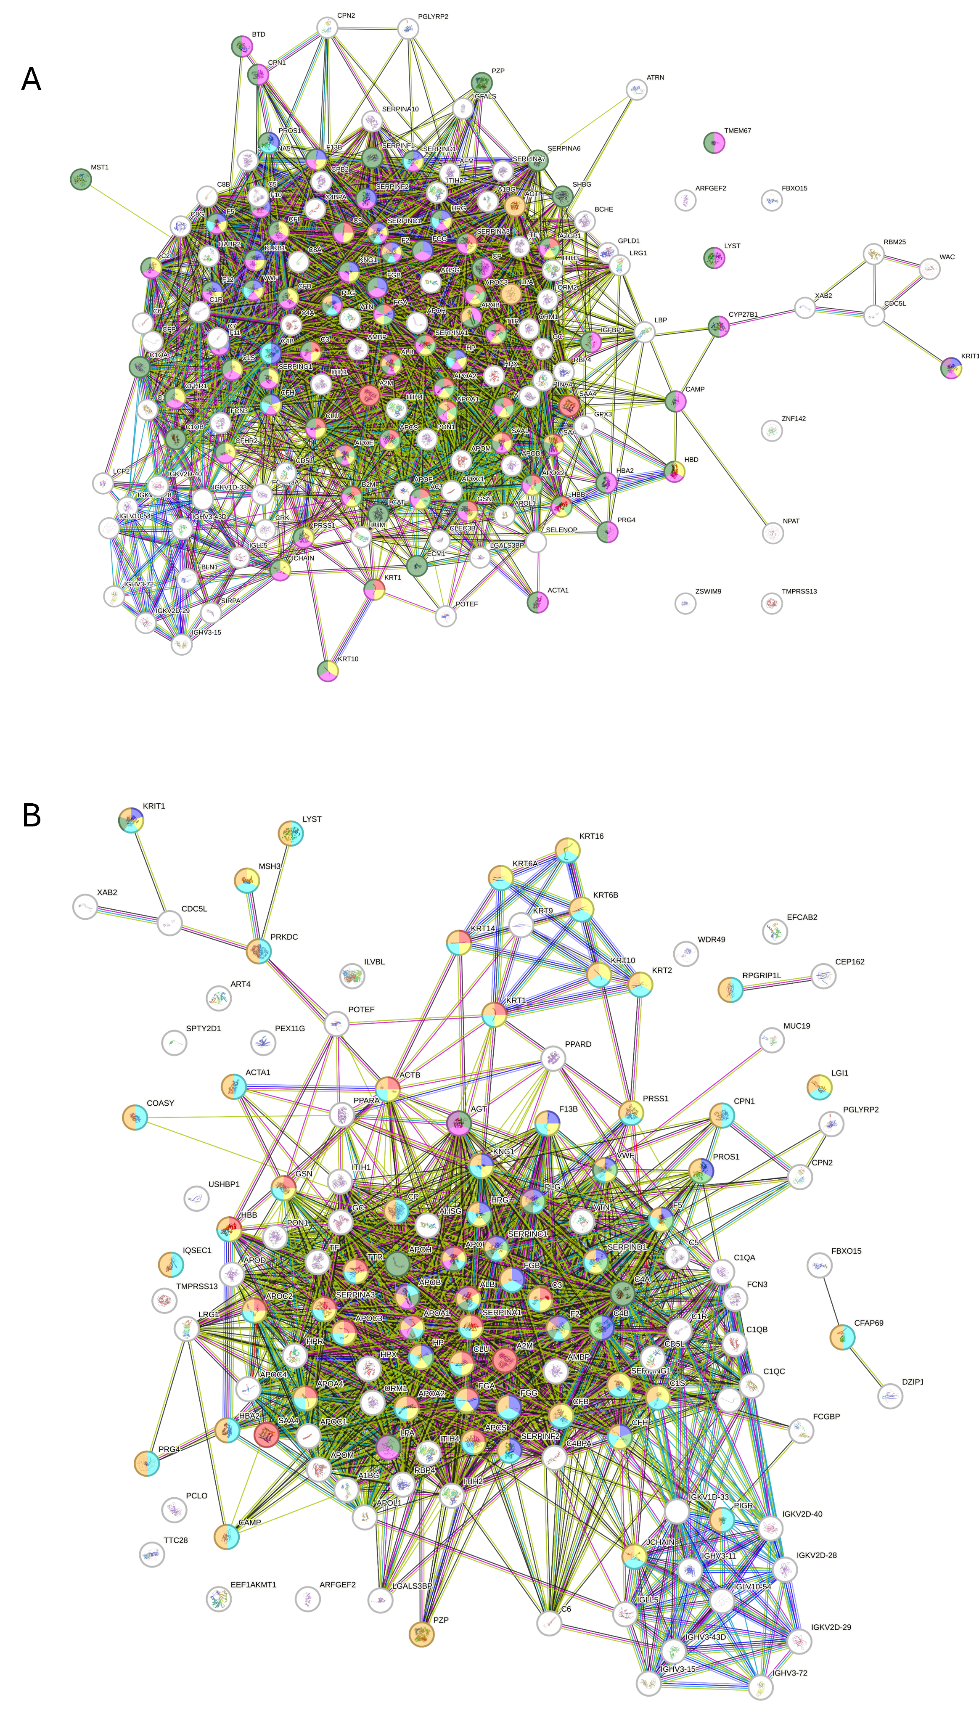


**Figure S2.** **Networks of differentially expressed proteins in plasma and total EVs. (A)** STRING Disease Gene Association analysis of total dysregulated plasma proteins revealed links to conditions such as amyloidosis, coagulation disorders, artery disease, and various genetic and vascular diseases. Although the overall PPI score was modest, the disease associations suggest relevant pathophysiological implications. **(B)** In the EVT protein dataset, STRING disease associations highlighted connections with amyloidosis, blood coagulation, monogenic and autosomal genetic diseases, as well as vascular and artery-related disorders. These findings suggest a potential role for EV proteins in mechanisms underlying these conditions.

**Figure S3.**


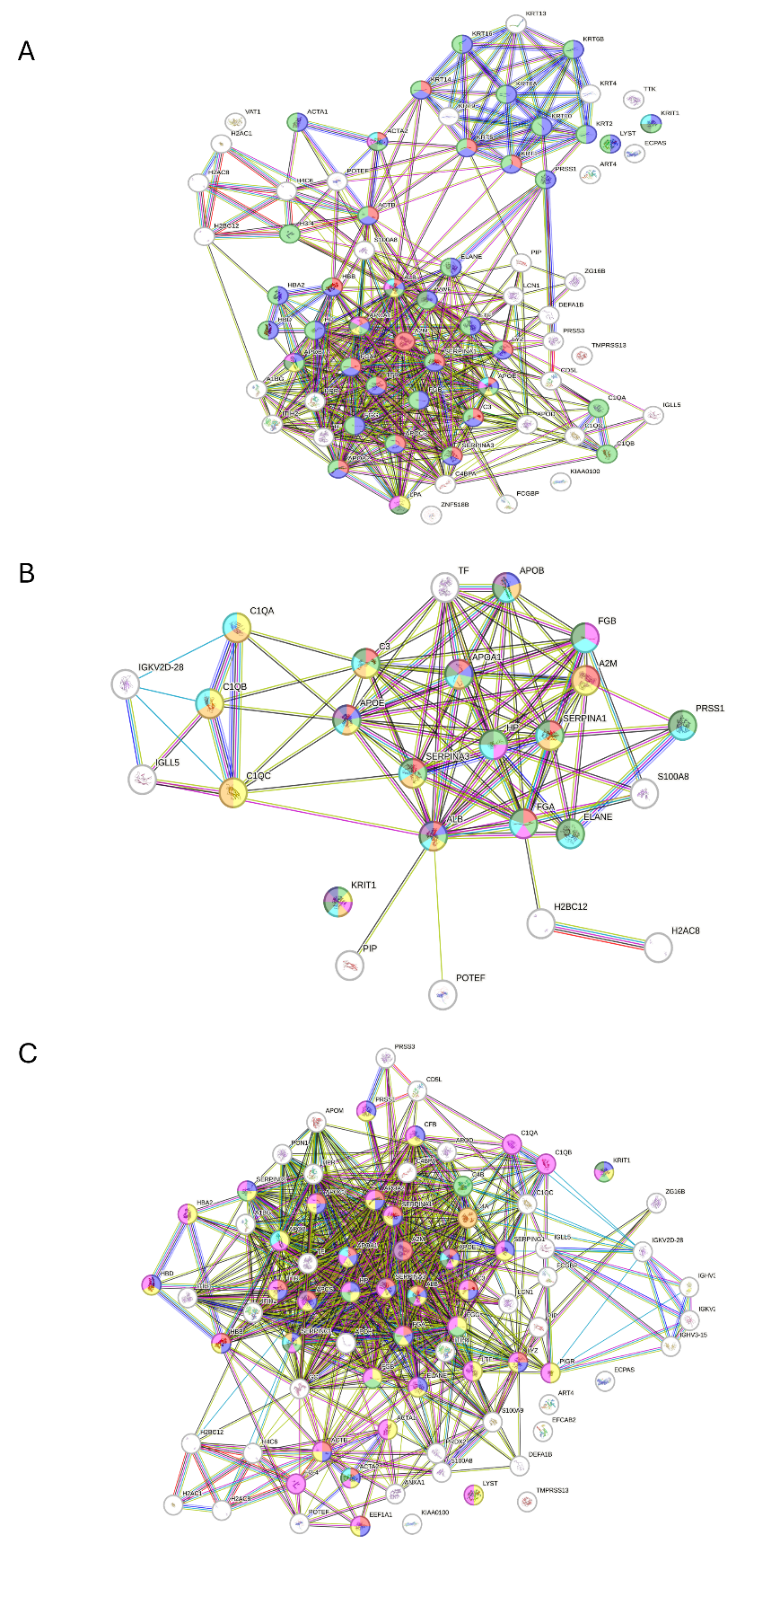


**Figure S3. Networks of differentially expressed proteins in enriched EVs.** **(A)** STRING-based protein–protein interaction network showing functional associations among significantly of total dysregulated proteins in the nEVs dataset, with enrichment of extracellular matrix, vesicle-related, and ribosomal components. **(B)** STRING interaction network constructed from the significantly altered proteins in aEVs, identifying clusters related to vesicle biology, ribosomal units, and extracellular matrix components. **(C)** STRING analysis of the oEVs proteome highlights a functional network of interacting proteins enriched in vesicular, matrix-associated, and ribosomal elements.

**Figure S4.**


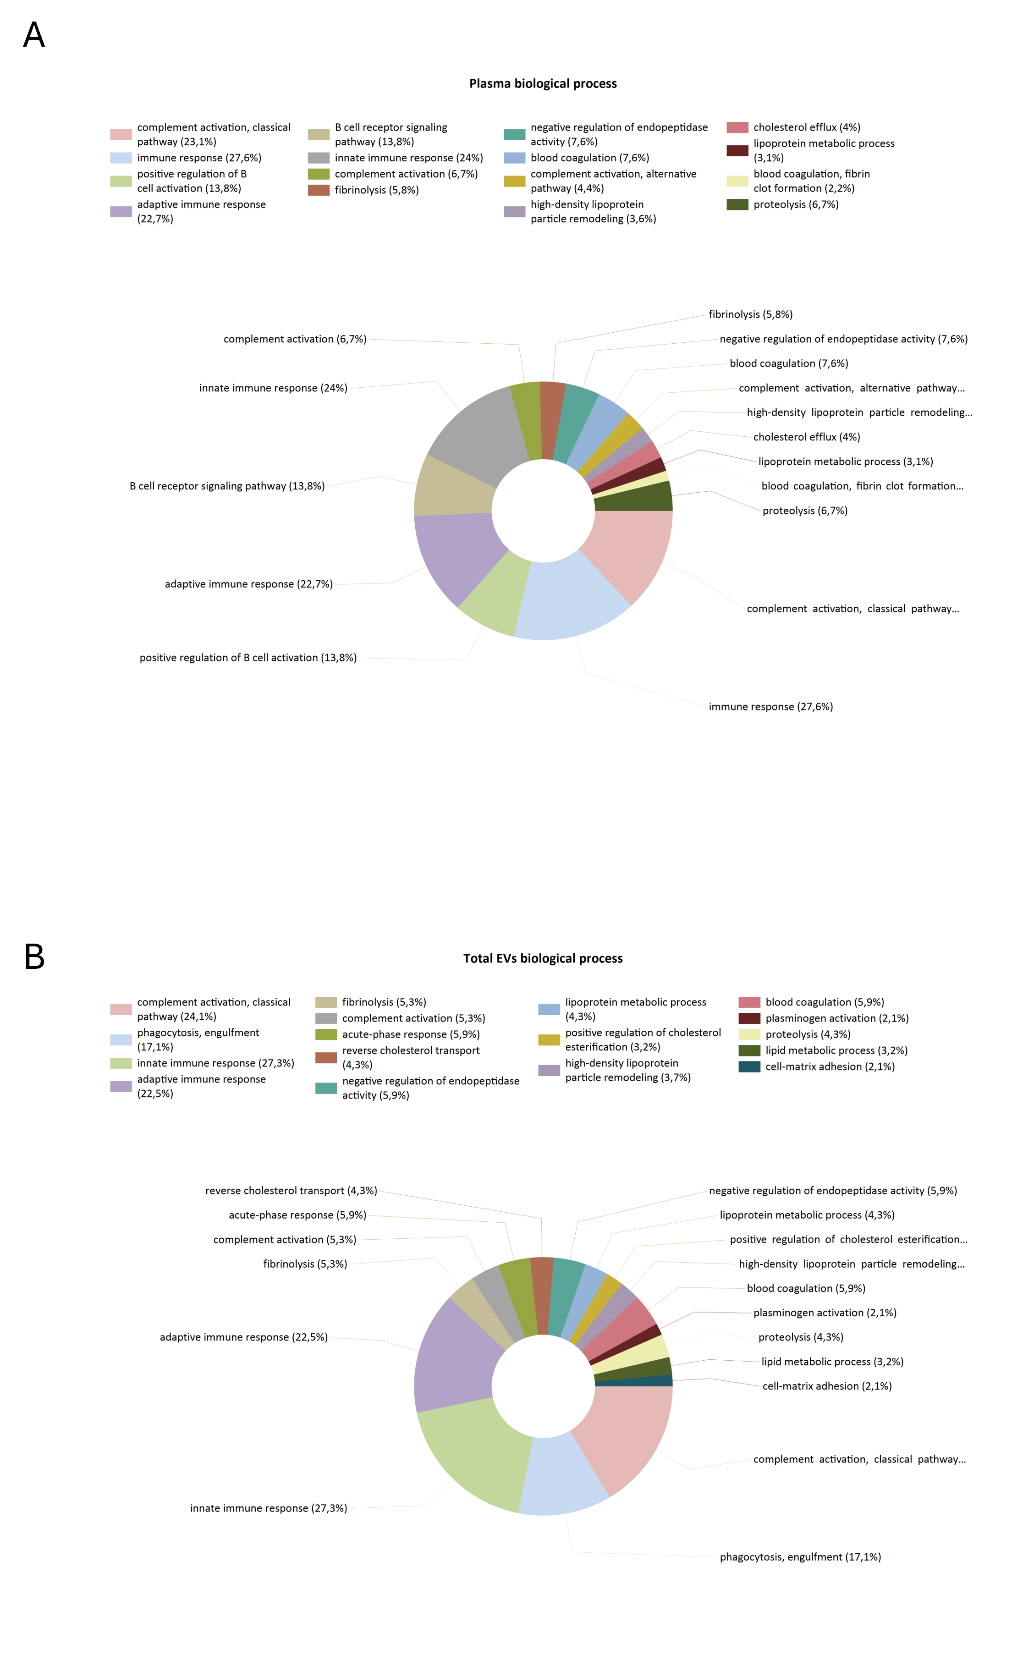


**Figure S4*.* Functional profiling of dysregulated EVT and plasma proteins.** Biological processes were analyzed using FunRich by comparing the lists of dysregulated proteins inplasma **(A)** and EVT **(B)** against the UniProt-based background database. The most significantly enriched biological processes are highlighted, reflecting the functional roles in which these proteins are predominantly involved.

**Figure S5**


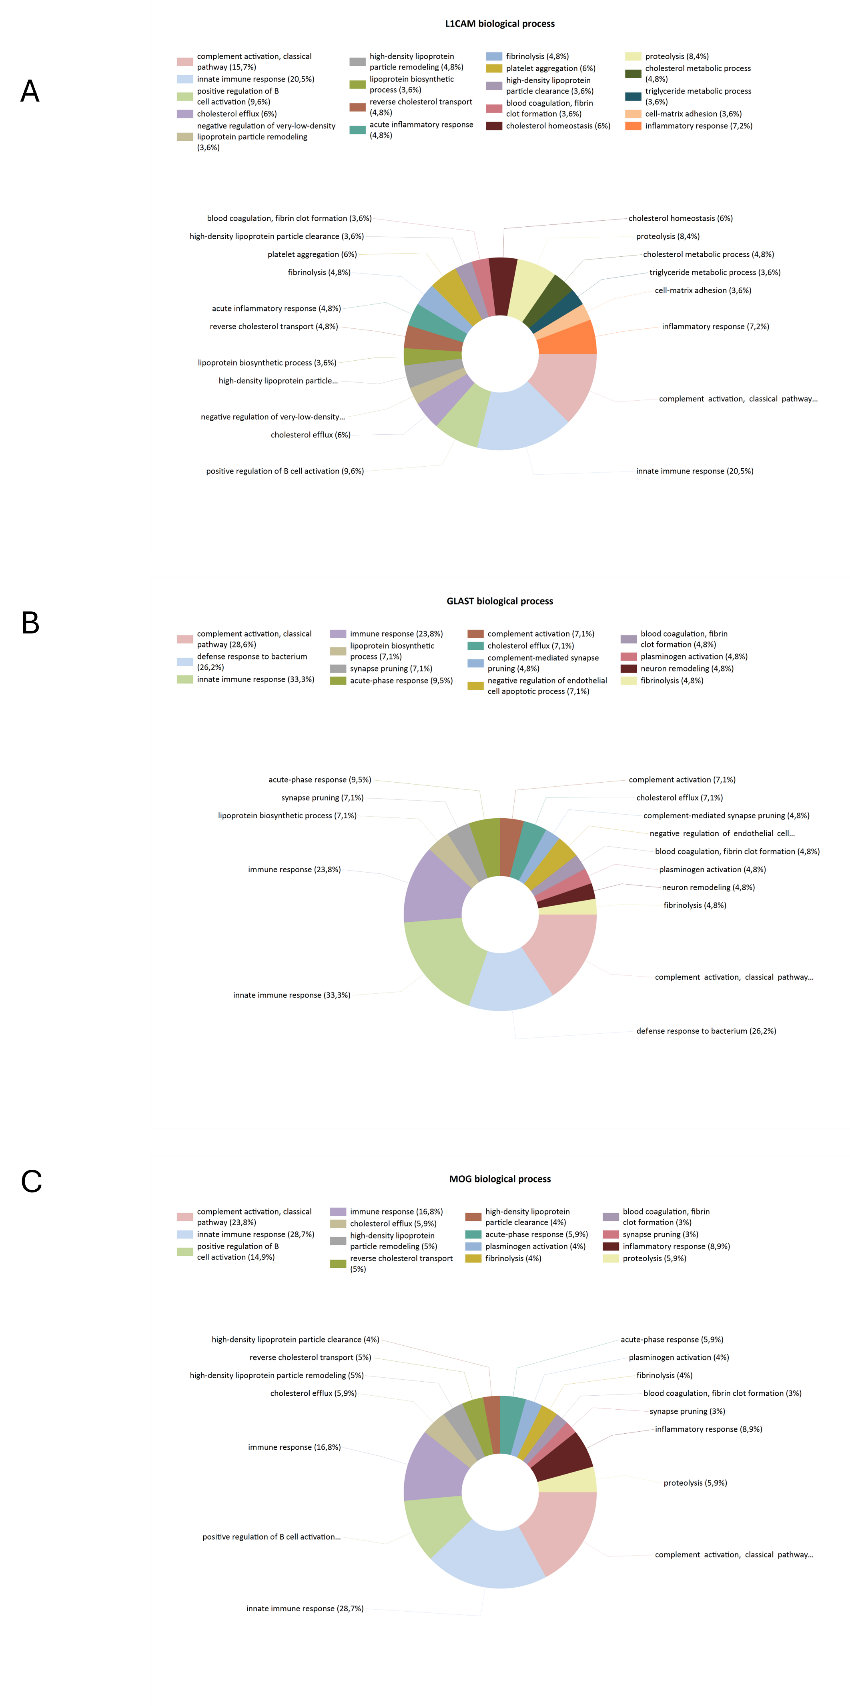


**Figure S5.** **Functional analysis of specific EVs proteins.** Biological process enrichment analysis was performed using FunRich, comparing dysregulated proteins from nEVs **(A),** aEvs **(B)** andoEVs **(C)** with the UniProt reference database. The most significantly overrepresented biological processes are shown, highlighting key functional pathways associated with these protein sets.

**REFERENCES**

1. Abramowicz A, Marczak L, Wojakowska A, Zapotoczny S, Whiteside TL, Widlak P, Pietrowska M: **Harmonization of exosome isolation from culture supernatants for optimized proteomics analysis.** *PLoS One* 2018, **13:**e0205496.

2. Rodrigues JS, Chenlo M, Bravo SB, Perez-Romero S, Suarez-Farina M, Sobrino T, Sanz-Pamplona R, Gonzalez-Prieto R, Blanco Freire MN, Nogueiras R, et al: **dsRNAi-mediated silencing of PIAS2beta specifically kills anaplastic carcinomas by mitotic catastrophe.** *Nat Commun* 2024, **15:**3736.

3. Candamo-Lourido M, Dopico-Lopez A, Lopez-Arias E, Lopez-Amoedo S, Correa-Paz C, Chantada-Vazquez MP, Bugallo-Casal A, Del Pozo-Filiu L, Perez-Gayol L, Palomar-Alonso N, et al: **Comparative Brain Proteomic Analysis between Sham and Cerebral Ischemia Experimental Groups.** *Int J Mol Sci* 2024, **25**.

4. Casado-Fernandez L, Laso-Garcia F, Piniella D, Gomez-de Frutos MC, Otero-Ortega L, Bravo SB, Fuentes-Gimeno B, Docando F, Alonso-Lopez E, Ruiz-Ares G, et al: **The proteomic signature of circulating extracellular vesicles following intracerebral hemorrhage: Novel insights into mechanisms underlying recovery.** *Neurobiol Dis* 2024, **201:**106665.

5. Bugallo-Casal A, Muino E, Bravo SB, Hervella P, Arias-Rivas S, Rodriguez-Yanez M, Vara-Leon E, Quintas-Rey R, Perez-Gayol L, Maisterra-Santos O, et al: **NOTCH3 Variant Position Affects the Phenotype at the Pluripotent Stem Cell Level in CADASIL.** *Neuromolecular Med* 2025, **27:**18.

6. Alvarez JV, Bravo SB, Chantada-Vazquez MP, Pena C, Colon C, Tomatsu S, Otero-Espinar FJ, Couce ML: **Morquio A Syndrome: Identification of Differential Patterns of Molecular Pathway Interactions in Bone Lesions.** *Int J Mol Sci* 2024, **25**.

7. Ayuso-Garcia P, Sanchez-Rueda A, Velasco-Aviles S, Tamayo-Caro M, Ferrer-Pinos A, Huarte-Sebastian C, Alvarez V, Riobello C, Jimenez-Vega S, Buendia I, et al: **Neddylation orchestrates the complex transcriptional and posttranscriptional program that drives Schwann cell myelination.** *Sci Adv* 2024, **10:**eadm7600.

8. Garcia-Vega D, Sanchez-Lopez D, Rodriguez-Carnero G, Villar-Taibo R, Vinuela JE, Lestegas-Soto A, Seoane-Blanco A, Moure-Gonzalez M, Bravo SB, Fernandez AL, et al: **Semaglutide modulates prothrombotic and atherosclerotic mechanisms, associated with epicardial fat, neutrophils and endothelial cells network.** *Cardiovasc Diabetol* 2024, **23:**1.
